# Supplementary material for: A novel solvent-free strategy for the synthesis of bismuth oxyhalides
Source: Royal Society of Chemistry journal article supplement (doi:10.1039/c8ta04529a), 2018-01-01
Supplement: c8ta04529a1.pdf [file c8ta04529a1.pdf]

## SUPPLEMENTARY INFORMATION

### A novel solvent-free strategy for the synthesis of bismuth oxyhalides

Yang Long<sup>a</sup>, Qiang Han<sup>a</sup>, Zhiqing Yang<sup>b</sup>, Yongjian Ai<sup>a</sup>, Shaoai Sun<sup>a</sup>, Yi Wang<sup>\*b</sup>, Qionglin Liang<sup>\*a</sup>,  
Mingyu Ding<sup>\*a</sup>

a: MOE Key Laboratory of Bioorganic Phosphorus Chemistry & Chemical Biology; Department of Chemistry, Tsinghua University, Beijing, 100089, P.R. China.

Phone/Fax: +86-010-62772263. E-mail: [liangql@mail.tsinghua.edu.cn](mailto:liangql@mail.tsinghua.edu.cn).

Phone/Fax: +86-010-62797087. E-mail: [dingmy@mail.tsinghua.edu.cn](mailto:dingmy@mail.tsinghua.edu.cn).

b: Key Laboratory of Marine Environmental Corrosion and Bio-fouling, Institute of Oceanology, Chinese Academy of Sciences, Qingdao, 266071, P.R. China.

Phone/Fax: +86-532-82898960. E-mail: [wangyi@qdio.ac.cn](mailto:wangyi@qdio.ac.cn).

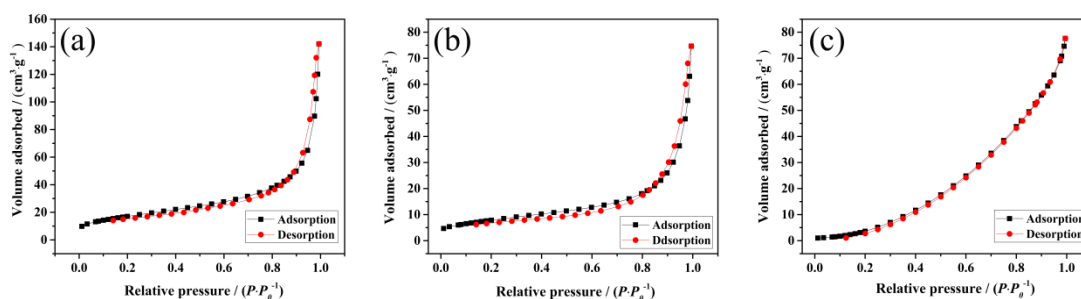

Figure S1. Nitrogen adsorption-desorption isotherm of bismuth oxyhalides (a: BiOCl, b: BiOBr, c: BiOI).

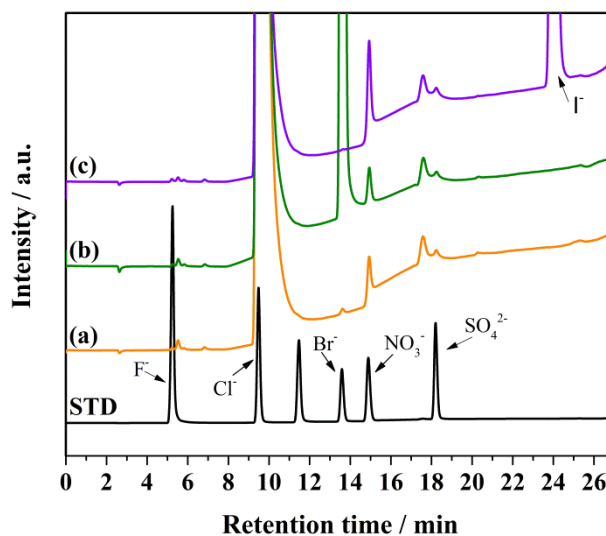

Figure S2. Ion chromatograms of bismuth oxyhalides (a: BiOCl, b: BiOBr, c: BiOI) dissolved in hydrochloric acid.

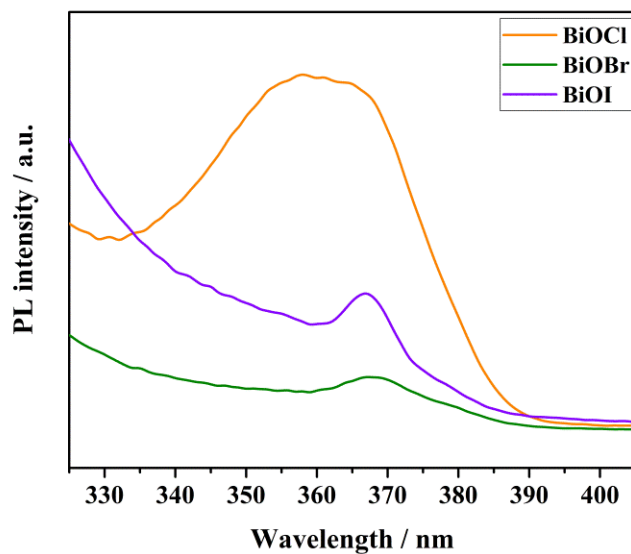

Figure S3 PL spectra of BiOX synthesized by grinding method.

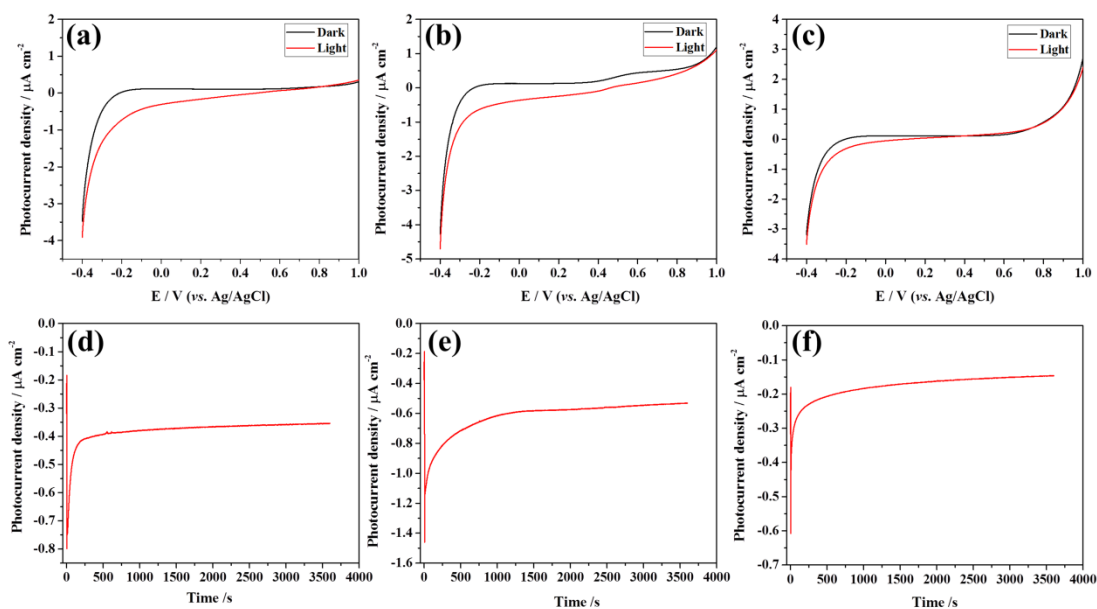

Figure S4 The current–voltage behavior of (a)BiOCl, (b) BiOBr, and (c) BiOI dip-coating film under  $100 \text{ mW cm}^{-2}$  illumination in  $0.1 \text{ M Na}_2\text{SO}_4$  electrolyte, respectively. The stability of (d)BiOCl, (e) BiOBr, and (f) BiOI dip-coating film at an applied voltage of  $-0.2 \text{ V vs. Ag/AgCl}$  after 1 hour.

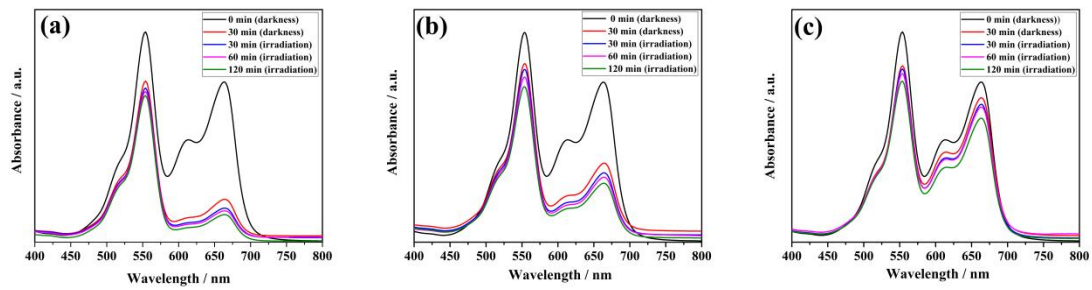

Figure S5 Photodecomposition coupled adsorption of MB and RhB mixture with (a) BiOCl, (b) BiOBr, and (c) BiOI under simulated sunlight irradiation.
